# Supplementary material for: Deep Tissue Characterization with Optical Coherence Elastography: A Comparison of Different Methods
Source: MDPI journal article supplement (doi:10.3390/ma15238558), 2022-12-01
Supplement: s1 [file s1]

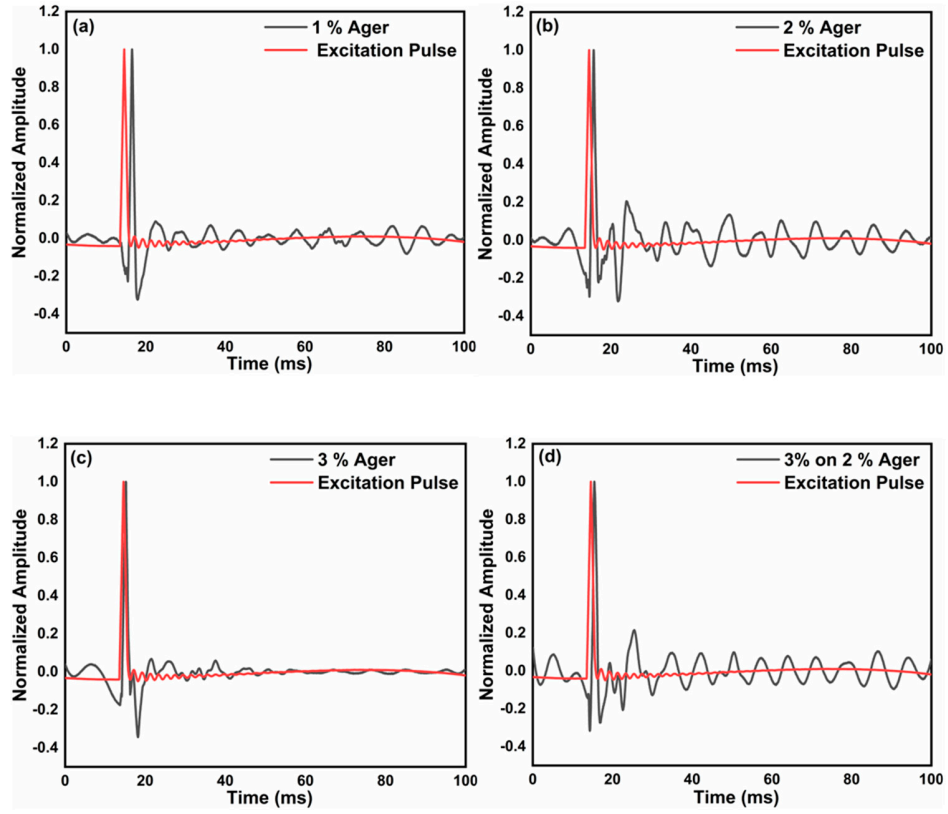

**Supplementary Figure S1.** Excitation pulse from the piezo and the surface acoustic wave pulse measured on the sample using pulsed excitation method in (a) monolayer 1%, (b) monolayer 2% (c) monolayer 3% and (d) dual layer 3% on 2 % ager phantom.

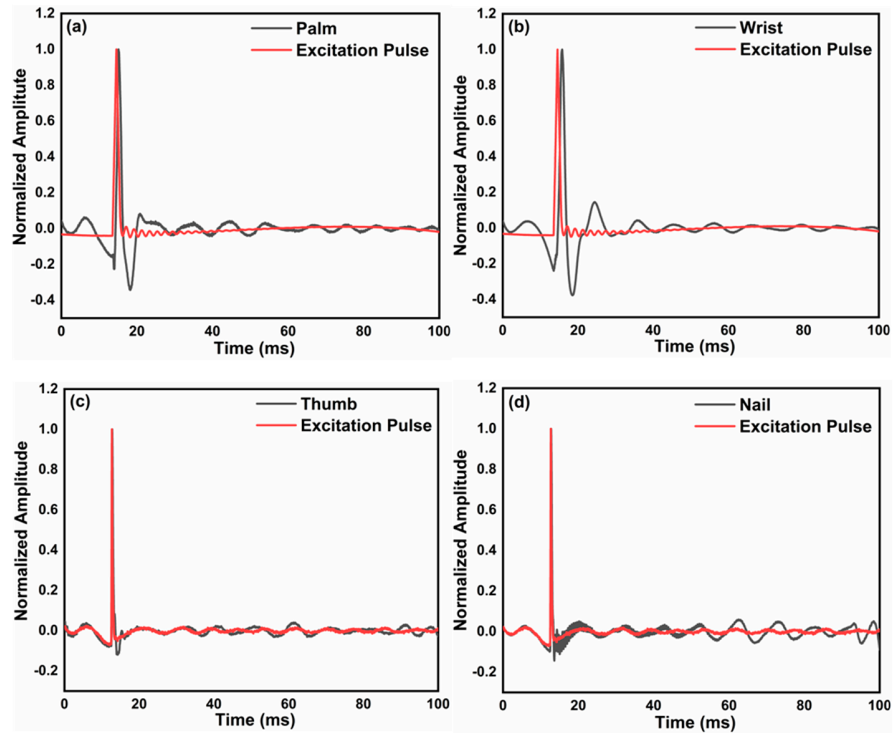

**Figure S2.** Excitation pulse from the piezo and the surface acoustic wave pulse measured on (a) palm (b) wrist (c) thumb and (d) nail of a healthy volunteer.
